# Supplementary material
Source: publisher site journal article supplement (https://www.spandidos-publications.com/6776/downloadSupplementary)
Supplement: Supplementary file 1 [file downloadSupplementary]

## Sheet: Supplementary_Table_SXII
Table SXII. Candidate drugs targeting the MAPK and mTORC1 signaling pathways from the Connectivity Map tool.
Rank	Tau score	Type	ID	Name	Description
8238	-98.1	cp	BRD-K29733039	Deforolimus	MTOR inhibitor
8086	-96.44	cp	BRD-K49865102	PD-0325901	MEK inhibitor
8041	-95.87	cp	BRD-K62810658	PD-98059	MEK inhibitor
6336	-54.55	cp	BRD-K77008974	WYE-354	MTOR inhibitor
6326	-54.21	cp	BRD-K12244279	MEK1-2-inhibitor	MEK inhibitor
6197	-50.18	cp	BRD-K18787491	U-0126	MEK inhibitor
5754	-37.81	cp	BRD-K67566344	KU-0063794	MTOR inhibitor
5734	-37.38	cp	BRD-K89014967	AS-703026	MEK inhibitor
5372	-26.98	cp	BRD-K53523901	Arctigenin	MEK inhibitor
5046	-18.81	cp	BRD-K27305650	LY-294002	MTOR inhibitor
4487	-5.29	cp	BRD-K48427617	U-0124	MEK inhibitor
4465	-4.46	cp	BRD-K67868012	PI-103	MTOR inhibitor
4017	10.46	cp	BRD-K12184916	Dactolisib	MTOR inhibitor
3906	12.77	cp	BRD-K05104363	PD-184352	MEK inhibitor
3873	13.21	cp	BRD-K57080016	Selumetinib	MEK inhibitor
3867	13.31	cp	BRD-K69932463	AZD-8055	MTOR inhibitor
2734	39.31	cp	BRD-K40175214	Torin-1	MTOR inhibitor
2642	41.42	cp	BRD-K06753942	Nobiletin	MEK inhibitor
2268	53.41	cp	BRD-K94294671	OSI-027	MTOR inhibitor
1800	68.28	cp	BRD-U33728988	QL-X-138	MTOR inhibitor
1505	77.25	cp	BRD-K68174511	Torin-2	MTOR inhibitor
1082	88.72	cp	BRD-A45498368	WYE-125132	MTOR inhibitor
867	93.28	cp	BRD-K92817986	BJM-CSC-19	MEK inhibitor
831	93.78	cp	BRD-A62025033	Temsirolimus	MTOR inhibitor
792	94.47	cp	BRD-K89626439	Sirolimus	MTOR inhibitor
612	97.08	cp	BRD-K13514097	Everolimus	MTOR inhibitor
cp, chemical perturbations
